# Supplementary material for: Spectroscopic and computational study of β-ethynylphenylene substituted zinc and free-base porphyrins
Source: Royal Society of Chemistry journal article supplement (doi:10.1039/c0cp01113d), 2010-12-02
Supplement: c0cp01113d.pdf [file c0cp01113d.pdf]

Supplementary information for A spectroscopic and  
computational study of  $\beta$ -ethynylphenylene  
substituted zinc and free-base porphyrins

John C. Earles, Keith C. Gordon, Adam W.I. Stephenson,  
Ashton C. Partridge, David L. Officer

April 5, 2011

The experimental FT-IR and FT-Raman spectra for the free-base and Zn  
compounds are shown.

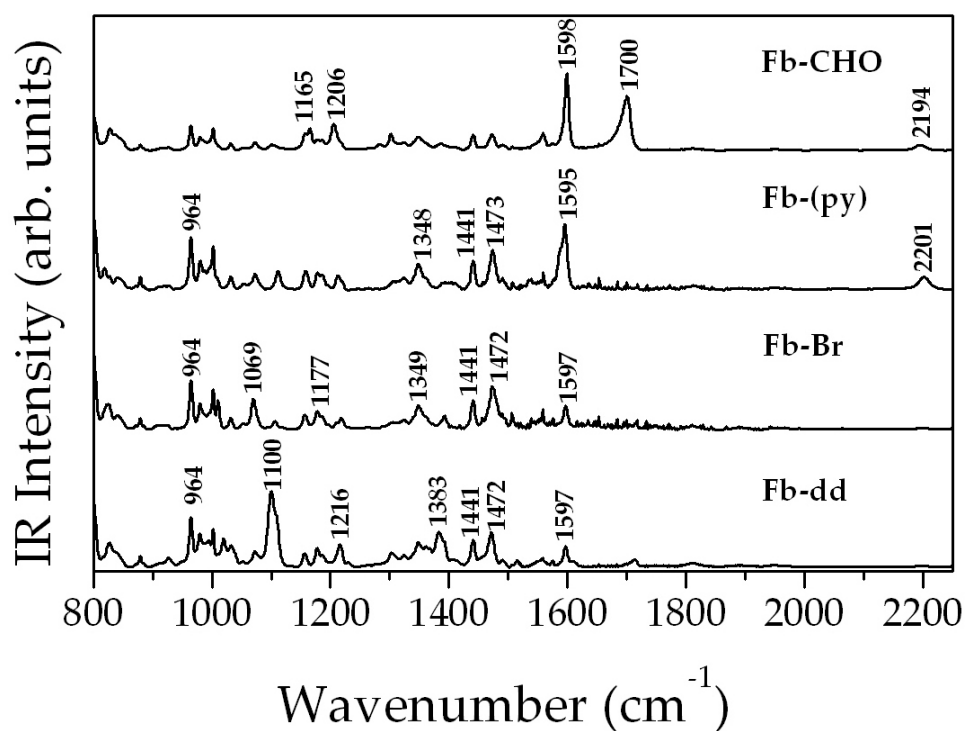

Figure 1: The experimental infrared spectra for free base porphyrins (Figure 1 main text), measured as solid state samples as described in the experimental section of the main text.

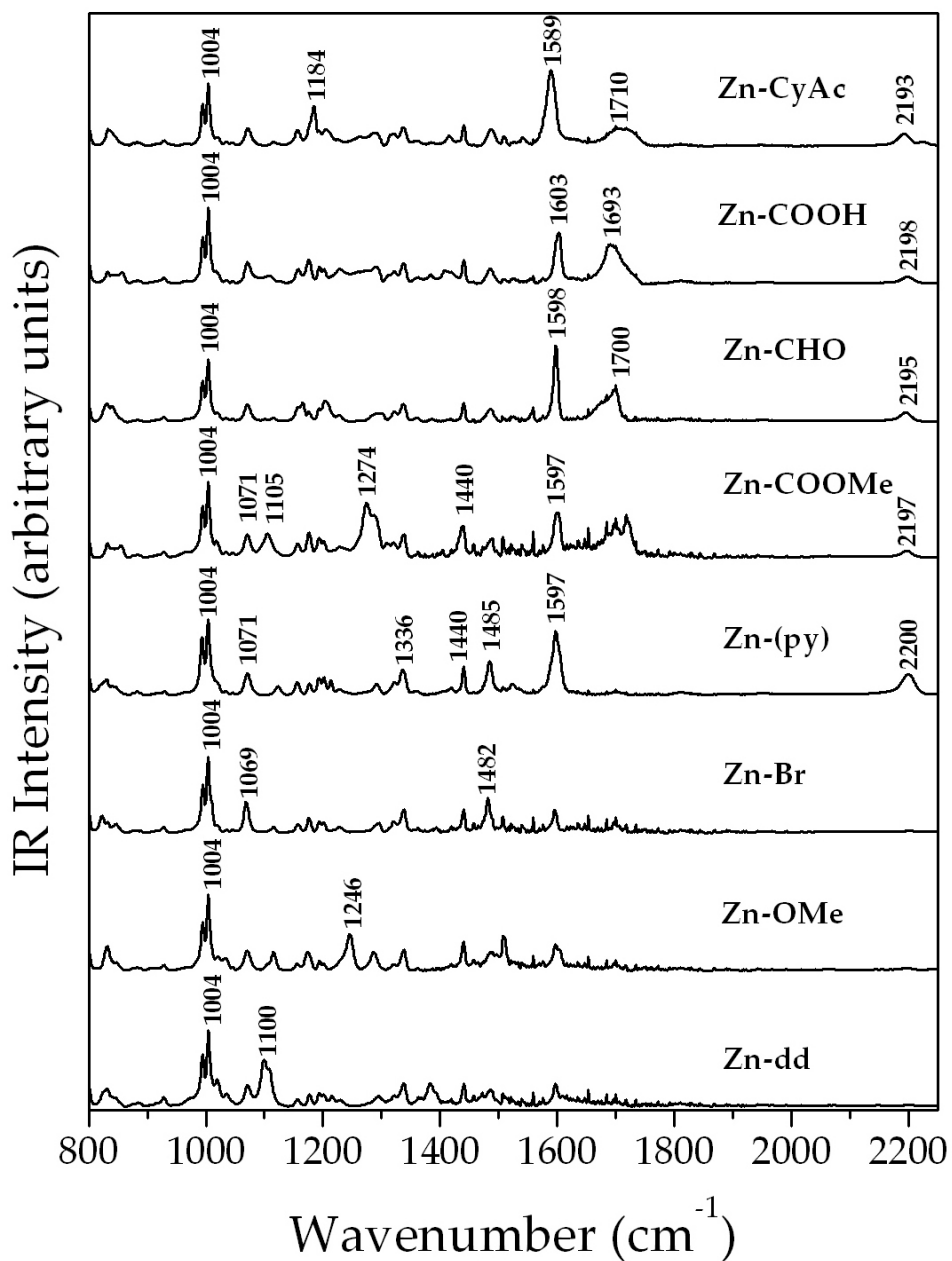

Figure 2: The experimental infrared spectra for zinc porphyrins (Figure 1 main text), measured as solid state samples as described in the experimental section of the main text.

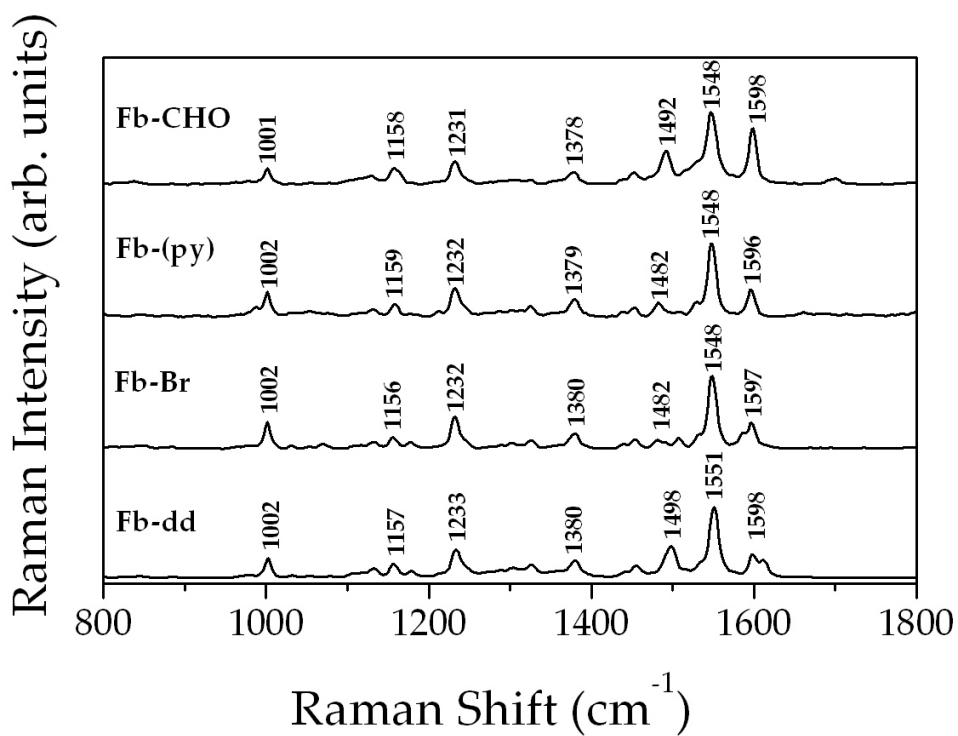

Figure 3: The experimental FT-Raman spectra for free base porphyrins (Figure 1 main text), measured as solid state samples as described in the experimental section of the main text.

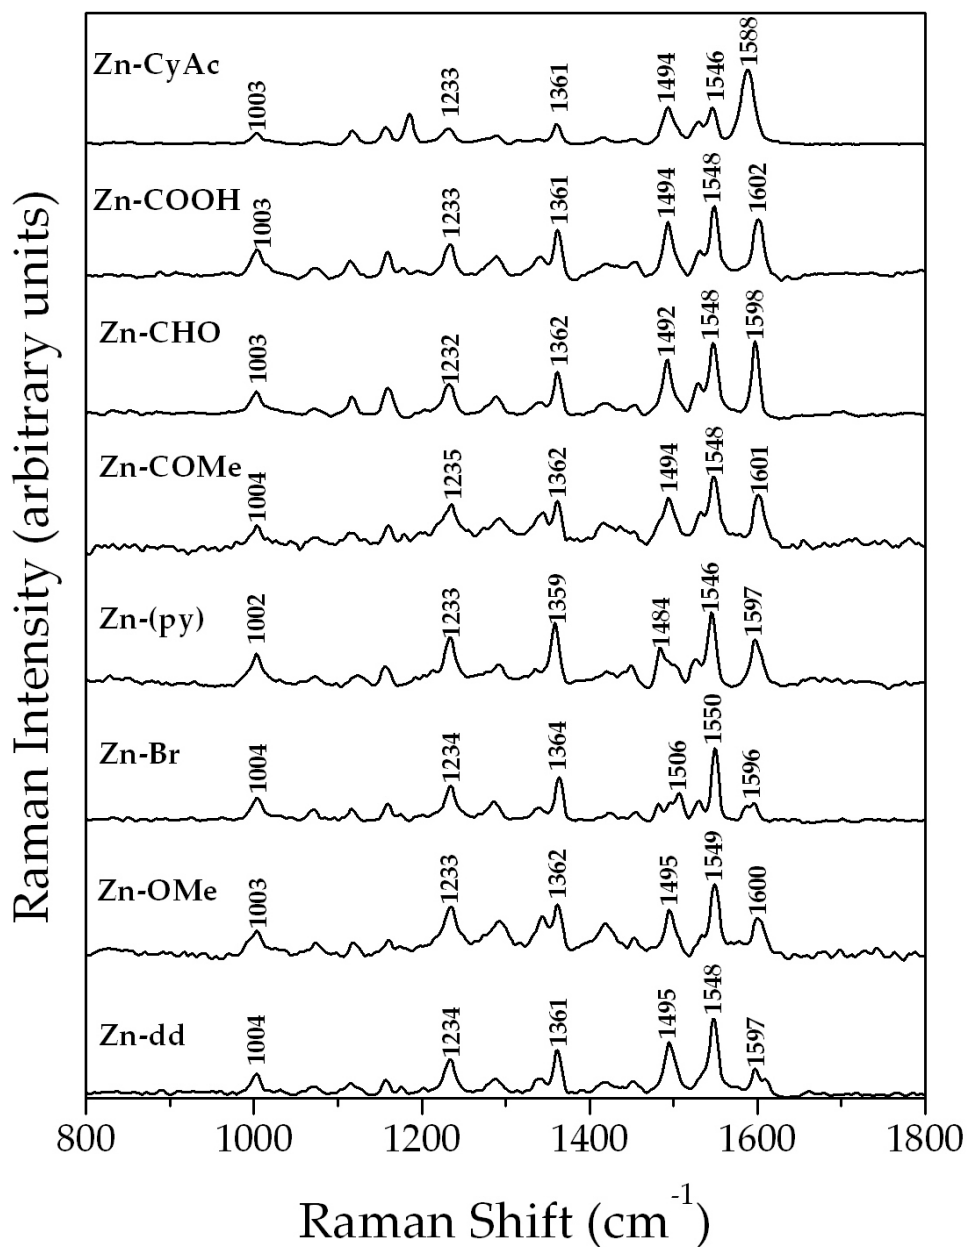

Figure 4: The experimental FT-Raman spectra for zinc base porphyrins (Figure 1 main text), measured as solid state samples as described in the experimental section of the main text.
